# Supplementary material for: Doping Engineering for Optimizing Piezoelectric and Elastic Performance of AlN
Source: MDPI journal article supplement (doi:10.3390/ma16051778), 2023-02-21
Supplement: s1 [file s1]

# Doping Engineering for Optimizing Piezoelectric and Elastic Performance of AlN

Xi Yu <sup>1,†</sup>, Lei Zhu <sup>2,†</sup>, Xin Li <sup>3</sup>, Jia Zhao <sup>2</sup>, Tingjun Wu <sup>2</sup>, Wenjie Yu <sup>2,3</sup> and Weimin Li <sup>1,2,3,\*</sup>

<sup>1</sup> School of Microelectronics, Shanghai University, Shanghai 201899, China; yuxi666@shu.edu.cn

<sup>2</sup> State Key Laboratory of Functional Materials for Informatics, Shanghai Institute of Microsystem and Information Technology, Chinese Academy of Sciences, Shanghai 200050, China; leizhu@mail.sim.ac.cn (L.Z.); zhaojia@mail.sim.ac.cn (J.Z.); tjwu@mail.sim.ac.cn (T.W.); casan@mail.sim.ac.cn (W.Y.)

<sup>3</sup> Shanghai Institute of IC Materials Co., Ltd., Shanghai 201899, China; xinli@sicm.com.cn

\* Correspondence: weimin.li@mail.sim.ac.cn

† These authors contributed equally to this work.

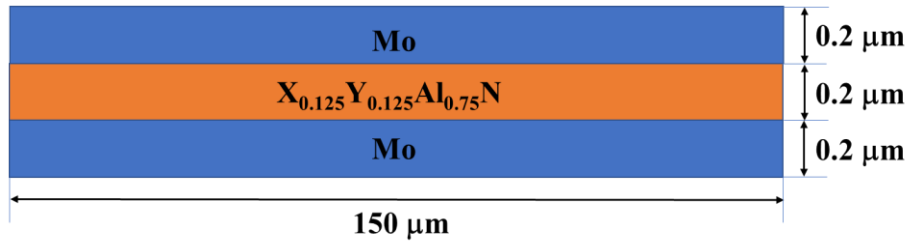

**Figure S1** The two-dimensional sandwich structure of the resonator.

**Table S1.** Physical parameters of materials utilized in simulation

| Piezoelectric materials                     | Density(kg/m <sup>3</sup> ) | $e_{33}$ (C/m <sup>2</sup> ) | $C_{33}$ (Pa) | Relative permittivity |
|---------------------------------------------|-----------------------------|------------------------------|---------------|-----------------------|
| Be <sub>0.125</sub> Ce <sub>0.125</sub> AlN | 3843.200                    | 2.115                        | 2.720E+11     | 16.369                |
| B <sub>0.125</sub> Er <sub>0.125</sub> AlN  | 4209.300                    | 2.112                        | 2.622E+11     | 11.847                |
| Mg <sub>0.125</sub> Ti <sub>0.125</sub> AlN | 3225.100                    | 2.408                        | 2.611E+11     | 12.510                |
| Sc <sub>0.25</sub> AlN                      | 3219.900                    | 1.869                        | 2.495E+11     | 11.360                |
| AlN                                         | 3205.100                    | 1.471                        | 3.598E+11     | 9.585                 |

The mechanically criterion was tested by Born-Huang criteria of hexagonal structure[1]:  $C_{11} > C_{12}$ ,  $2C_{13}^2 < C_{33}(C_{11} + C_{12})$ ,  $C_{44} > 0$ ,  $C_{66} > 0$ . It is clear that all of the models we considered are mechanically stable, and detailed results are listed in Table S2.

**Table S2.** Dopants considered in this study and the results of  $C_{11}$ - $C_{12}$ ,  $2C_{13}^2$ -  $C_{33}(C_{11}+C_{12})$ ,  $C_{66}$ .

| Group                  | Chemical formula                                             | $C_{11}$ - $C_{12}$<br>(GPa) | $2C_{13}^2$ -<br>$C_{33}(C_{11}+C_{12})$<br>(GPa <sup>2</sup> ) | $C_{66}$<br>(GPa) | If<br>stable |
|------------------------|--------------------------------------------------------------|------------------------------|-----------------------------------------------------------------|-------------------|--------------|
| IA(X) +<br>VA/VB(Y)    | Li <sub>0.125</sub> As <sub>0.125</sub> Al <sub>0.75</sub> N | 217.422                      | -112853.599                                                     | 94.981            | √            |
|                        | Li <sub>0.125</sub> Nb <sub>0.125</sub> Al <sub>0.75</sub> N | 179.625                      | -71698.154                                                      | 88.215            | √            |
|                        | Li <sub>0.125</sub> Sb <sub>0.125</sub> Al <sub>0.75</sub> N | 192.476                      | -61642.424                                                      | 91.658            | √            |
|                        | Li <sub>0.125</sub> Ta <sub>0.125</sub> Al <sub>0.75</sub> N | 180.820                      | -84021.593                                                      | 97.728            | √            |
|                        | Na <sub>0.125</sub> Ta <sub>0.125</sub> Al <sub>0.75</sub> N | 154.334                      | -44263.793                                                      | 83.001            | √            |
|                        | K <sub>0.125</sub> Nb <sub>0.125</sub> Al <sub>0.75</sub> N  | 124.384                      | -69973.078                                                      | 66.850            | √            |
|                        | K <sub>0.125</sub> Ta <sub>0.125</sub> Al <sub>0.75</sub> N  | 137.523                      | -52000.058                                                      | 69.423            | √            |
|                        | Rb <sub>0.125</sub> Ta <sub>0.125</sub> Al <sub>0.75</sub> N | 127.566                      | -47646.108                                                      | 72.332            | √            |
|                        | Rb <sub>0.125</sub> V <sub>0.125</sub> Al <sub>0.75</sub> N  | 139.538                      | -70238.711                                                      | 87.125            | √            |
| IIA(X) +<br>IVA/IVB(Y) | Be <sub>0.125</sub> C <sub>0.125</sub> Al <sub>0.75</sub> N  | 159.475                      | -116695.581                                                     | 91.849            | √            |
|                        | Be <sub>0.125</sub> Ce <sub>0.125</sub> Al <sub>0.75</sub> N | 121.725                      | -61017.664                                                      | 73.101            | √            |
|                        | Be <sub>0.125</sub> Ge <sub>0.125</sub> Al <sub>0.75</sub> N | 256.600                      | -157231.279                                                     | 111.159           | √            |
|                        | Be <sub>0.125</sub> Hf <sub>0.125</sub> Al <sub>0.75</sub> N | 201.073                      | -107150.023                                                     | 103.099           | √            |
|                        | Be <sub>0.125</sub> Pb <sub>0.125</sub> Al <sub>0.75</sub> N | 214.989                      | -126974.964                                                     | 93.005            | √            |
|                        | Be <sub>0.125</sub> Si <sub>0.125</sub> Al <sub>0.75</sub> N | 250.586                      | -160800.695                                                     | 111.201           | √            |
|                        | Be <sub>0.125</sub> Sn <sub>0.125</sub> Al <sub>0.75</sub> N | 231.171                      | -136327.764                                                     | 101.125           | √            |
|                        | Be <sub>0.125</sub> Ti <sub>0.125</sub> Al <sub>0.75</sub> N | 216.891                      | -115798.731                                                     | 105.903           | √            |
|                        | Be <sub>0.125</sub> Zr <sub>0.125</sub> Al <sub>0.75</sub> N | 196.193                      | -97386.926                                                      | 98.910            | √            |
|                        | Mg <sub>0.125</sub> C <sub>0.125</sub> Al <sub>0.75</sub> N  | 196.618                      | -116767.714                                                     | 105.300           | √            |
|                        | Mg <sub>0.125</sub> Ce <sub>0.125</sub> Al <sub>0.75</sub> N | 126.932                      | -65843.005                                                      | 71.791            | √            |
|                        | Mg <sub>0.125</sub> Ge <sub>0.125</sub> Al <sub>0.75</sub> N | 226.452                      | -127379.233                                                     | 102.066           | √            |
|                        | Mg <sub>0.125</sub> Hf <sub>0.125</sub> Al <sub>0.75</sub> N | 180.075                      | -80807.221                                                      | 95.735            | √            |
|                        | Mg <sub>0.125</sub> Pb <sub>0.125</sub> Al <sub>0.75</sub> N | 195.192                      | -106048.038                                                     | 86.251            | √            |
|                        | Mg <sub>0.125</sub> Si <sub>0.125</sub> Al <sub>0.75</sub> N | 231.206                      | -133641.743                                                     | 108.042           | √            |
|                        | Mg <sub>0.125</sub> Sn <sub>0.125</sub> Al <sub>0.75</sub> N | 210.925                      | -118339.501                                                     | 95.462            | √            |
|                        | Mg <sub>0.125</sub> Ti <sub>0.125</sub> Al <sub>0.75</sub> N | 199.802                      | -95314.837                                                      | 99.020            | √            |
|                        | Mg <sub>0.125</sub> Zr <sub>0.125</sub> Al <sub>0.75</sub> N | 187.514                      | -81809.303                                                      | 92.272            | √            |
|                        | Ca <sub>0.125</sub> Ce <sub>0.125</sub> Al <sub>0.75</sub> N | 104.665                      | -62731.181                                                      | 59.206            | √            |
|                        | Ca <sub>0.125</sub> Ge <sub>0.125</sub> Al <sub>0.75</sub> N | 179.259                      | -81768.671                                                      | 80.804            | √            |
|                        | Ca <sub>0.125</sub> Hf <sub>0.125</sub> Al <sub>0.75</sub> N | 157.504                      | -77299.133                                                      | 79.034            | √            |
|                        | Ca <sub>0.125</sub> Pb <sub>0.125</sub> Al <sub>0.75</sub> N | 152.658                      | -73682.705                                                      | 71.576            | √            |
|                        | Ca <sub>0.125</sub> Si <sub>0.125</sub> Al <sub>0.75</sub> N | 193.790                      | -98906.248                                                      | 87.347            | √            |
|                        | Ca <sub>0.125</sub> Sn <sub>0.125</sub> Al <sub>0.75</sub> N | 166.095                      | -80000.920                                                      | 80.412            | √            |
|                        | Ca <sub>0.125</sub> Ti <sub>0.125</sub> Al <sub>0.75</sub> N | 164.901                      | -88012.165                                                      | 87.630            | √            |
|                        | Ca <sub>0.125</sub> Zr <sub>0.125</sub> Al <sub>0.75</sub> N | 137.779                      | -53745.238                                                      | 75.533            | √            |
|                        | Sr <sub>0.125</sub> Ge <sub>0.125</sub> Al <sub>0.75</sub> N | 151.658                      | -70739.473                                                      | 65.425            | √            |
|                        | Sr <sub>0.125</sub> Hf <sub>0.125</sub> Al <sub>0.75</sub> N | 121.972                      | -38055.532                                                      | 62.935            | √            |
|                        | Sr <sub>0.125</sub> Si <sub>0.125</sub> Al <sub>0.75</sub> N | 178.822                      | -88722.725                                                      | 80.937            | √            |

|                                |                                                              |         |             |         |   |
|--------------------------------|--------------------------------------------------------------|---------|-------------|---------|---|
| IIIA/IIIB(X) +<br>IIIA/IIIB(Y) | Sr <sub>0.125</sub> Sn <sub>0.125</sub> Al <sub>0.75</sub> N | 149.516 | -72220.820  | 80.124  | √ |
|                                | Sr <sub>0.125</sub> Ti <sub>0.125</sub> Al <sub>0.75</sub> N | 139.152 | -49786.625  | 72.739  | √ |
|                                | Sr <sub>0.125</sub> Zr <sub>0.125</sub> Al <sub>0.75</sub> N | 137.085 | -72930.183  | 69.771  | √ |
|                                | Ba <sub>0.125</sub> Ce <sub>0.125</sub> Al <sub>0.75</sub> N | 162.708 | -36438.610  | 84.831  | √ |
|                                | Ba <sub>0.125</sub> Ce <sub>0.125</sub> Al <sub>0.75</sub> N | 81.059  | -56504.127  | 58.995  | √ |
|                                | Ba <sub>0.125</sub> Hf <sub>0.125</sub> Al <sub>0.75</sub> N | 125.097 | -51771.349  | 75.076  | √ |
|                                | Ba <sub>0.125</sub> Si <sub>0.125</sub> Al <sub>0.75</sub> N | 149.030 | -78398.380  | 91.476  | √ |
|                                | Ba <sub>0.125</sub> Sn <sub>0.125</sub> Al <sub>0.75</sub> N | 132.316 | -97377.052  | 64.345  | √ |
|                                | Ba <sub>0.125</sub> Ti <sub>0.125</sub> Al <sub>0.75</sub> N | 132.633 | -52026.077  | 82.655  | √ |
|                                | Ba <sub>0.125</sub> Zr <sub>0.125</sub> Al <sub>0.75</sub> N | 134.349 | -41246.734  | 42.632  | √ |
|                                | B <sub>0.125</sub> Er <sub>0.125</sub> Al <sub>0.75</sub> N  | 135.400 | -79236.333  | 80.369  | √ |
|                                | B <sub>0.125</sub> Ga <sub>0.125</sub> Al <sub>0.75</sub> N  | 262.601 | -187115.965 | 115.669 | √ |
|                                | B <sub>0.125</sub> La <sub>0.125</sub> Al <sub>0.75</sub> N  | 152.927 | -83277.217  | 97.025  | √ |
|                                | B <sub>0.125</sub> Sc <sub>0.125</sub> Al <sub>0.75</sub> N  | 174.276 | -110146.273 | 106.033 | √ |
|                                | B <sub>0.125</sub> Y <sub>0.125</sub> Al <sub>0.75</sub> N   | 172.711 | -89167.692  | 90.901  | √ |
|                                | Sc <sub>0.125</sub> Ga <sub>0.125</sub> Al <sub>0.75</sub> N | 203.343 | -112536.751 | 93.887  | √ |
|                                | Sc <sub>0.125</sub> La <sub>0.125</sub> Al <sub>0.75</sub> N | 116.371 | -66158.658  | 70.979  | √ |
|                                | Sc <sub>0.125</sub> Y <sub>0.125</sub> Al <sub>0.75</sub> N  | 136.847 | -55648.047  | 79.537  | √ |
|                                | Er <sub>0.125</sub> Ga <sub>0.125</sub> Al <sub>0.75</sub> N | 182.802 | -98097.040  | 86.268  | √ |
|                                | Er <sub>0.125</sub> La <sub>0.125</sub> Al <sub>0.75</sub> N | 116.700 | -75347.453  | 66.326  | √ |
|                                | Er <sub>0.125</sub> Sc <sub>0.125</sub> Al <sub>0.75</sub> N | 166.965 | -64324.952  | 81.906  | √ |
|                                | Er <sub>0.125</sub> Y <sub>0.125</sub> Al <sub>0.75</sub> N  | 122.063 | -53059.318  | 72.057  | √ |
|                                | In <sub>0.125</sub> B <sub>0.125</sub> Al <sub>0.75</sub> N  | 200.190 | -133514.877 | 98.772  | √ |
|                                | In <sub>0.125</sub> Ga <sub>0.125</sub> Al <sub>0.75</sub> N | 218.181 | -144321.591 | 97.042  | √ |
|                                | In <sub>0.125</sub> Sc <sub>0.125</sub> Al <sub>0.75</sub> N | 178.166 | -98377.421  | 88.966  | √ |
|                                | In <sub>0.125</sub> Y <sub>0.125</sub> Al <sub>0.75</sub> N  | 160.289 | -84553.634  | 77.894  | √ |
|                                | La <sub>0.125</sub> Ga <sub>0.125</sub> Al <sub>0.75</sub> N | 155.340 | -86234.389  | 71.685  | √ |
|                                | Y <sub>0.125</sub> Ga <sub>0.125</sub> Al <sub>0.75</sub> N  | 174.196 | -110884.945 | 87.588  | √ |
|                                | Y <sub>0.125</sub> La <sub>0.125</sub> Al <sub>0.75</sub> N  | 110.666 | -72513.420  | 66.562  | √ |

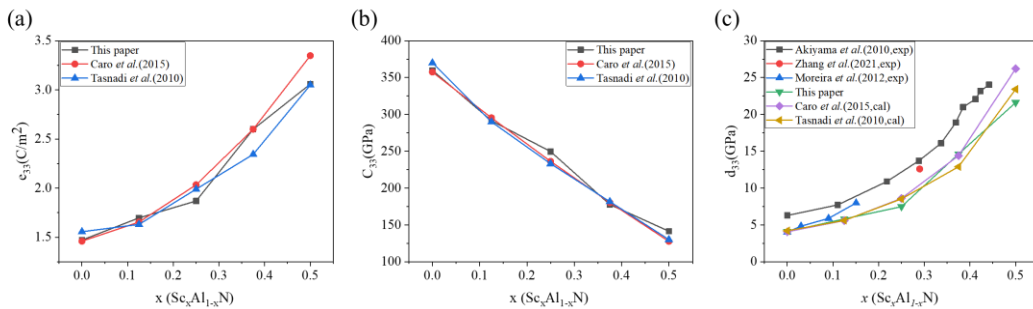

**Figure S2.** The calculated and experimented (a) $e_{33}$ , (b) $C_{33}$  and (c) $d_{33}$  of  $\text{Sc}_x\text{Al}_{1-x}\text{N}$  ( $x = 0\sim 0.5$ ). Our calculated  $e_{33}$  and  $C_{33}$  of  $\text{Sc}_x\text{Al}_{1-x}\text{N}$  ( $x = 0\sim 0.5$ ) are consistent with the reported values of Caro et al. [2], Tasnadi et al. [3], Akiyama et al.[4], Zhang et al.[5] and Moreira et al.[6].

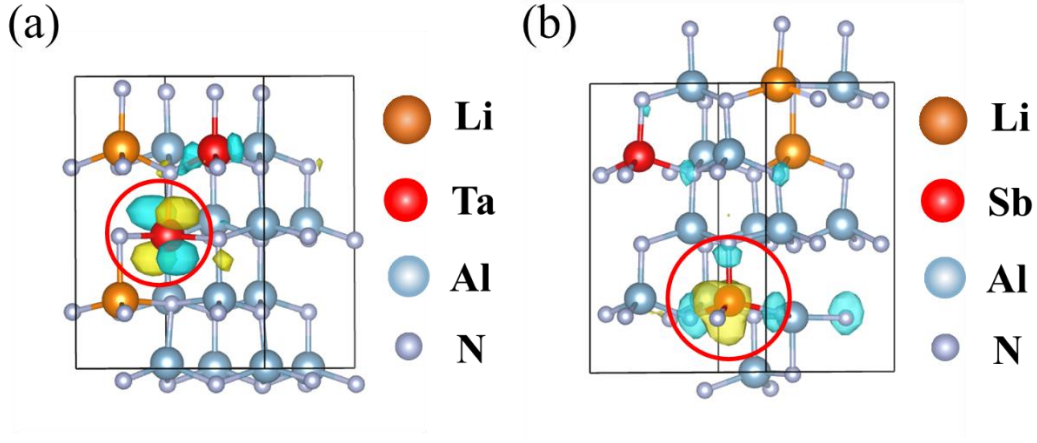

**Figure S3.** (a-b) Wave function analyses of  $\text{Li}_{0.125}\text{Ta}_{0.125}\text{Al}_{0.75}\text{N}$  and  $\text{Li}_{0.125}\text{Sb}_{0.125}\text{Al}_{0.75}\text{N}$ . Blue represents bonding orbitals, yellow represents anti-bonding orbitals.

#### The discussion viscosity coefficient

For acoustical materials, after introducing mechanical losses and a positive idle steady-state response, the constitutive equation [7] can become

$$\begin{aligned} \mathbf{T} &= \mathbf{c} : \mathbf{S} + j\omega\boldsymbol{\eta} \rightarrow \mathbf{c}' : \mathbf{S} \\ \mathbf{c}' &= \mathbf{c} + j\omega\boldsymbol{\eta} \end{aligned} \quad (\text{S1})$$

The mechanical loss is represented by the viscosity coefficient  $\boldsymbol{\eta}$ , which is the same fourth order tensor as the elastic stiffness constant  $\mathbf{c}$ . At the same time,  $\mathbf{c}'$  can be expressed as

$$\mathbf{c}' = (\mathbf{1} + j\boldsymbol{\eta}_s)\mathbf{c} \quad (\text{S2})$$

where  $\boldsymbol{\eta}_s$  is Isotropic structural loss factor. With equations 2 and 3 it can be deduced that

$$\boldsymbol{\eta} = \frac{\boldsymbol{\eta}_s \mathbf{c}}{\omega} \quad (\text{S3})$$

#### The mechanism of $C_{33}$

The hardness of crystal with n types of bonds can be expressed as [8] [9] [10],

$$H_k (\text{GPa}) = 423.8n \left[ \prod_{a,b=1}^n \frac{N_{ab}}{V} X_{ab} e^{-2.7f_i(ab)} \right]^{\frac{1}{n}} - 3.4 \quad (\text{S4})$$

$$X_{ab} = \sqrt{\frac{\chi_a \chi_b}{CN_a CN_b}} \quad (\text{S5})$$

$$f_i = \frac{\frac{1}{2}|\chi_a - \chi_b|}{2\sqrt{\chi_a \chi_b}} \quad (\text{S6})$$

where  $f_i$  ( $i=1,2,3,\dots,n$ ),  $N_{ab}/V$ ,  $X_{ab}$ , and  $CN_j$  ( $j=a,b$ ) represent ionicity indicator, the density of covalent bond a-b, electronegativity (EN), and coordination numbers of atom a or b. The covalent bond is composed of  $(1/CN_a)$  a atom and  $(1/CN_b)$  b atom. The hardness of crystal is positively related to  $X_{ab}$  and bond density  $N_{ab}/V$  and negatively related to the ionicity indicator  $f_i$ .

For typical multi-bond crystals  $\text{X}_{0.125}\text{Y}_{0.125}\text{Al}_{0.75}\text{N}$ , the hardness can be expressed as a geometrical sum of all binary bonds, X-N bond, Y-N bond and the Al-N bond. Due to the EN of all doping atoms we choose in this paper are smaller than N, thus the EN of X and Y larger,

the electronegativity difference smaller, and the  $C_{33}$  higher. For doping elements only has s- and p- electrons, they tend to format tetrahedral coordination as Al due to the  $sp^3$  hybridization. Only transition elements with d- or f- electrons tend to format non-tetrahedral (such as octahedral for  $Ti_3N_4$ ). However, due to X and Y atoms are doped into Al sites, there are only four N atoms around X and Y for bonding. Thus the influence of  $CN_j$  on  $C_{33}$  could be neglected. However, octahedral coordination atoms doped in the Al sites will produce lattice distortion. Moreover, the atom radius difference between doping atoms and substituted Al atoms also may produce lattice distortion. This effect can be consolidated by slight changes in the bond density. In general, the hardness of crystal is mainly affected by the ionicity indicator  $f_i$  and slightly affected by the bond density  $N_{ab}/V$  induced by the small lattice distortion.

## References

1. Born, M.; Huang, K.; Lax, M. Dynamical Theory of Crystal Lattices. *American Journal of Physics* **1955**, *23*, 474–474, doi:10.1119/1.1934059.
2. Caro, M.A.; Zhang, S.; Riekkinen, T.; Ylilampi, M.; Moram, M.A.; Lopez-Acevedo, O.; Molarius, J.; Laurila, T. Piezoelectric Coefficients and Spontaneous Polarization of ScAlN. *J. Phys.: Condens. Matter* **2015**, *27*, 245901, doi:10.1088/0953-8984/27/24/245901.
3. Tasnádi, F.; Alling, B.; Höglund, C.; Wingqvist, G.; Birch, J.; Hultman, L.; Abrikosov, I.A. Origin of the Anomalous Piezoelectric Response in Wurtzite  $ScxAl_{1-x}N$  Alloys. *Phys. Rev. Lett.* **2010**, *104*, 137601, doi:10.1103/PhysRevLett.104.137601.
4. Akiyama, M.; Kano, K.; Teshigahara, A. Influence of Growth Temperature and Scandium Concentration on Piezoelectric Response of Scandium Aluminum Nitride Alloy Thin Films. *Appl. Phys. Lett.* **2009**, *95*, 162107, doi:10.1063/1.3251072.
5. Zhang, Q.; Chen, M.; Liu, H.; Zhao, X.; Qin, X.; Wang, F.; Tang, Y.; Yeoh, K.H.; Chew, K.-H.; Sun, X. Deposition, Characterization, and Modeling of Scandium-Doped Aluminum Nitride Thin Film for Piezoelectric Devices. *Materials* **2021**, *14*, 6437, doi:10.3390/ma14216437.
6. Moreira, M.A.; Bjurström, J.; Yantchev, V.; Katardjiev, I. Synthesis and Characterization of Highly C-Textured  $Al(1-x)Sc(x)N$  Thin Films in View of Telecom Applications. *IOP Conf. Ser.: Mater. Sci. Eng.* **2012**, *41*, 012014, doi:10.1088/1757-899X/41/1/012014.
7. Auld, B.A. *Acoustic Fields and Waves in Solids*; Jone Wiley & Sons, 1973;
8. Sanderson, R.T. An Interpretation of Bond Lengths and a Classification of Bonds. *Science* **1951**, *114*, 670–672, doi:10.1126/science.114.2973.670.
9. Li, K.; Wang, X.; Zhang, F.; Xue, D. Electronegativity Identification of Novel Superhard Materials. *Phys. Rev. Lett.* **2008**, *100*, 235504, doi:10.1103/PhysRevLett.100.235504.
10. Gao, F.; He, J.; Wu, E.; Liu, S.; Yu, D.; Li, D.; Zhang, S.; Tian, Y. Hardness of Covalent Crystals. *Phys. Rev. Lett.* **2003**, *91*, 015502, doi:10.1103/PhysRevLett.91.015502.
